# Supplementary material for: Characterization of Extracellular Vesicles Isolated From Human Milk Using a Precipitation-Based Method
Source: PubMed Central journal article supplement (PMC7082312; doi:10.3389/fnut.2020.00022), 2020-03-13
Supplement: Image_1.pdf [file Image_1.pdf]

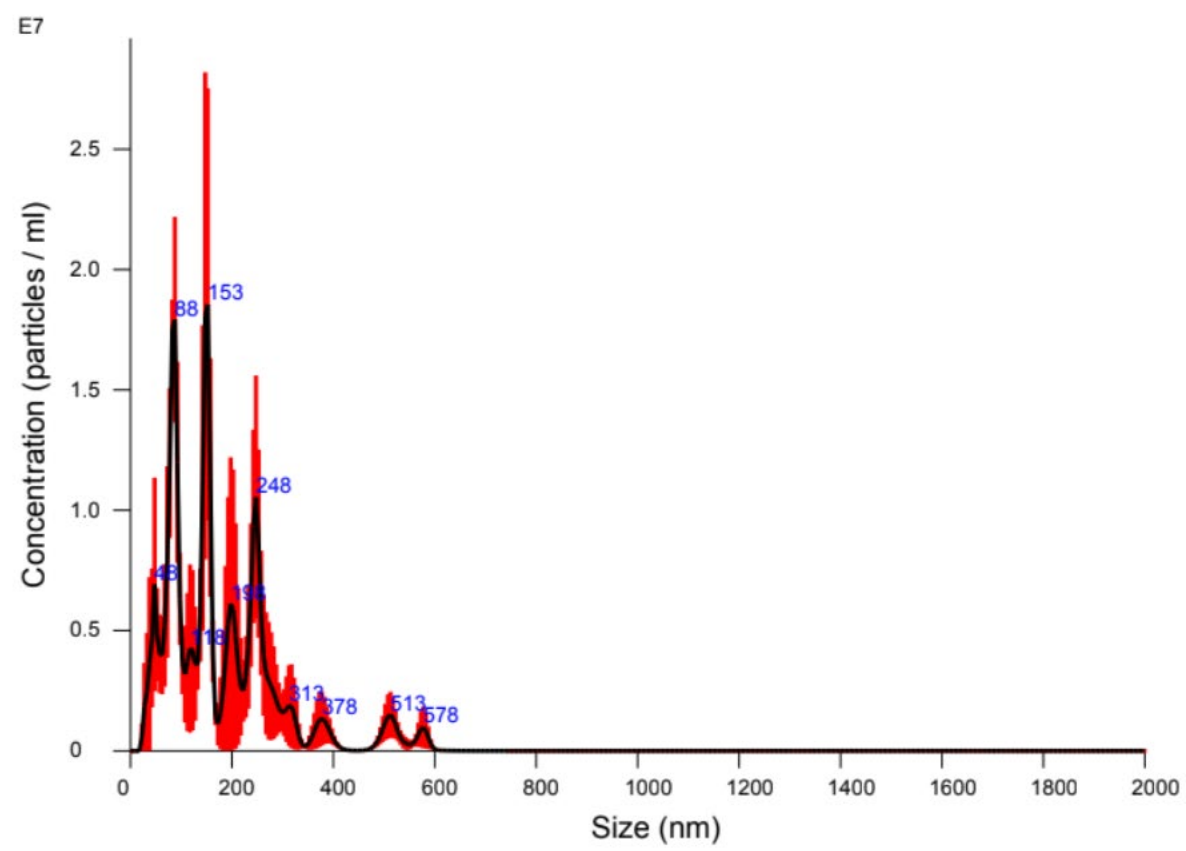

**Supplementary Figure 1.** Size distribution graph from nanoparticle tracking analysis (Nanosight NS01). Graph is the average of 3 x 30 sec flux at infusion of 40  $\mu$ L/min into microfluidics chamber. Error bars indicate + / - 1 standard error of the mean.
